# Supplementary material
Source: publisher site journal article supplement (https://www.dovepress.com/get_supplementary_file.php?f=510549.docx)
Supplement: Supplementary file 1 [file get_supplementary_file.php]

Supplementary Material

Table S1 Regression analysis of the association between triglyceride Levels and diabetes before data imputation

|  | Crude model  HR(95% CI) | P value | Model 1  HR(95% CI) | P value | Model2  HR(95% CI) | P value | Mode3  HR(95% CI) | P value |
| --- | --- | --- | --- | --- | --- | --- | --- | --- |
| TG | 2.02 (1.96, 2.08) | <0.001 | 1.69 (1.64, 1.75) | <0.001 | 1.33 (1.25, 1.42) | <0.001 | 1.188 (1.016, 1.388) | 0.030 |

CI Confdence interval, Ref Reference

Crude model: we did not adjust for other covariants

Model I: we adjusted for age, gender

Model 2:we adjusted for age, gender,BMI, SBP, DBP, FPG,HDL-C, LDL,ALT,BUN,SCR

Model 3:we adjusted for age, gender,BMI, SBP, DBP, FPG, HDL-C,LDL,ALT,BUN,SCR,smoking and drinking status ,family history of diabetes

Table S2 The results of the collinearity screening

|  | Step 1 | Step 2 |
| --- | --- | --- |
| Age(years) | 1.4 | 1.3 |
| Gender | 2.5 | 2.5 |
| BMI(kg/m2 ) | 1.5 | 1.5 |
| SBP(mmHg) | 2.2 | 2.2 |
| DBP(mmHg) | 2 | 2 |
| FPG(mmol/l) | 1.1 | 1.1 |
| HDL-C(mmol/l) | 1.4 | 1.2 |
| LDL(mmol/l) | 6 | 1.1 |
| TC(mmol/l) | 6.6 | NA |
| ALT(IU/L) | 3.3 | 3.3 |
| AST(IU/L) | 2.9 | 2.9 |
| BUN (mmol/L) | 1.2 | 1.2 |
| CCR(umol/L) | 2 | 2 |
| Smoking status | 1.3 | 1.3 |
| Drinking status | 1.1 | 1.1 |
| Family history of DM | 1 | 1 |

BMI body mass index; SBP systolic blood pressure;DBP diastolic blood pressure; FBG fasting blood glucose; TC total cholesterol;HDL-C high-density lipoprotein cholesterol; LDL Low-density lipoprotein；AST aspartate

aminotransferase,ALT alanine aminotransferase; BUN blood urea nitrogen;SCR serum creatinine;DM diabetes.
